# Supplementary material for: Automatic quantifying and monitoring follow-ups for implantable collamer lens implantation using AS-OCT images
Source: Frontiers journal article supplement (doi:10.3389/fphy.2022.969683), 2022-08-30
Supplement: Data_Sheet_1.docx [file Data_Sheet_1.docx]

Supplementary Material

Supplementary Table 1. The segmentation performance of angle recess points using different models

|  | **Errors of left angle recess point (mm)** | | | **Errors of right angle recess point (mm)** | | |
| --- | --- | --- | --- | --- | --- | --- |
|  | **X-coordinate** | **Y-coordinate** | **Absolute values** | **X-coordinate** | **Y-coordinate** | **Absolute values** |
| **ResNet-18** | 0.199 | 0.408 | 0.487 | 0.180 | 0.319 | 0.389 |
| **Improved U-Net** | 0.013 | 0.001 | 0.037 | -0.038 | -0.023 | 0.063 |

Supplementary Table 2. The Dice coefficient of different models

|  | **RelayNet** | **DeepLabel V3+** | **Improved U-Net** |
| --- | --- | --- | --- |
| **Left angle recess** | 0.826 | 0.861 | 0.865- |
| **Right angle recess** | 0.770 | 0.789 | 0.788- |
| **Corneosclera** | 0.925 | 0.888 | 0.960 |
| **ICL** | 0.700 | 0.926 | 0.928 |
| **Lens** | 0.754 | 0.956 | 0.911 |


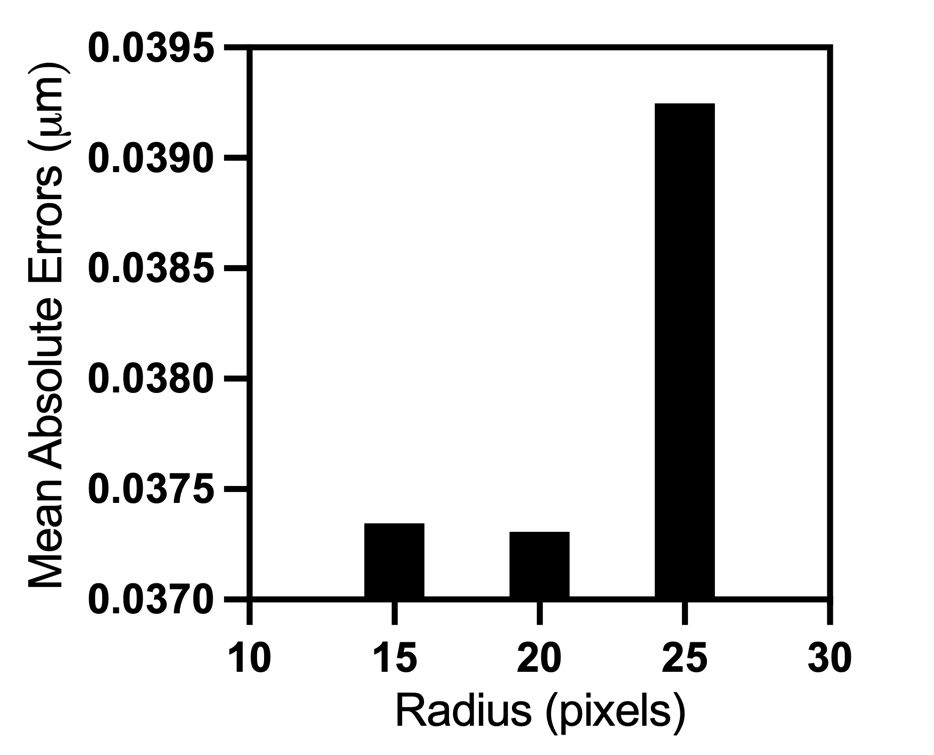


# Supplementary Figure 1. The relation between different radius and mean absolute errors.
